# Supplementary material
Source: ML conference proceedings conference paper supplement (https://proceedings.mlr.press/v115/wu20a.html)
Supplement: Supplementary file [file wu20a-supp.pdf]

---

# Practical Multi-fidelity Bayesian Optimization for Hyperparameter Tuning Supplementary Material

---

**Jian Wu**  
Operations Research  
& Information Eng.  
Cornell University  
Ithaca, NY 14850

**Saul Toscano-Palmerin**  
Operations Research  
& Information Eng.  
Cornell University  
Ithaca, NY 14850

**Peter I. Frazier**  
Operations Research  
& Information Eng.  
Cornell University  
Ithaca, NY 14850

**Andrew Gordon Wilson**  
Courant Institute  
of Mathematical Sciences  
New York University  
New York, NY 10003

## 1 Background: Gaussian processes

We put a Gaussian process (GP) prior [5] on the function  $g$ . The GP prior is defined by its mean function  $\mu_0 : A \times [0, 1]^m \mapsto \mathbb{R}$  and kernel function  $K_0 : \{A \times [0, 1]^m\} \times \{A \times [0, 1]^m\} \mapsto \mathbb{R}$ . These mean and kernel functions have hyperparameters, whose inference we discuss below.

We assume that evaluations of  $g(\mathbf{x}, \mathbf{s})$  are subject to additive independent normally distributed noise with common variance  $\sigma^2$ . We treat the parameter  $\sigma^2$  as a hyperparameter of our model, and also discuss its inference below. Our assumption of normally distributed noise with constant variance is common in the BO literature [2].

Here we use  $\mathbf{z} = (\mathbf{x}, \mathbf{s})$  to refer more briefly to a point, fidelity pair. The posterior distribution on  $g$  after observing  $n$  function values at points  $\mathbf{z}_{(1:n)} := \{(\mathbf{x}_{(1)}, \mathbf{s}_{(1)}), (\mathbf{x}_{(2)}, \mathbf{s}_{(2)}), \dots, (\mathbf{x}_{(n)}, \mathbf{s}_{(n)})\}$  with observed values  $y_{(1:n)} := \{y_{(1)}, y_{(2)}, \dots, y_{(n)}\}$  remains a Gaussian process [5], and  $g \mid \mathbf{z}_{(1:n)}, y_{(1:n)} \sim \text{GP}(\mu_n, K_n)$  with  $\mu_n$  and  $K_n$  as follows, where  $I$  is an identity matrix:

$$\begin{aligned} \mu_n(\mathbf{z}) &= \mu_0(\mathbf{z}) \\ &+ K_0(\mathbf{z}, \mathbf{z}_{1:n}) (K_0(\mathbf{z}_{1:n}, \mathbf{z}_{1:n}) + \sigma^2 I)^{-1} (y_{1:n} - \mu_0(\mathbf{z}_{1:n})) \end{aligned}$$

$$\begin{aligned} K_n(\mathbf{z}, \mathbf{z}') &= K_0(\mathbf{z}, \mathbf{z}') \\ &- K_0(\mathbf{z}, \mathbf{z}_{1:n}) (K_0(\mathbf{z}_{1:n}, \mathbf{z}_{1:n}) + \sigma^2 I)^{-1} K_0(\mathbf{z}_{1:n}, \mathbf{z}'). \end{aligned}$$

We should note that taKG may choose to retain more than one observations per evaluation because a single evaluation of  $g$  provides additional trace observations, and so  $n$  may be larger than the number of evaluations.

This statistical approach contains several hyperparameters: the variance  $\sigma^2$ , and any parameters in the mean

and kernel functions. We treat these hyperparameters in a Bayesian way as proposed in Snoek et al. [7]. We analogously train a separate GP on the logarithm of the cost of evaluating  $g(x, s)$ .

Now, using the notation of the paper, let  $C_n$  be the Cholesky factor of the covariance matrix  $K_n((\mathbf{x}, S), (\mathbf{x}, S)) + \sigma^2 I$ . Thus, by the previous equations,

$$\begin{aligned} \mathbb{E}_n[g(\mathbf{x}', \mathbf{1}) \mid \mathbf{y}(\mathbf{x}, S)] &= \mu_n(\mathbf{x}') \\ &+ K_n((\mathbf{x}', \mathbf{1}), (\mathbf{x}, S)) (C_n^T)^{-1} (C_n)^{-1} \\ &(\mathbf{y}(\mathbf{x}, S) - \mathbb{E}_n(\mathbf{y}(\mathbf{x}, S))), \end{aligned} \quad (1.1)$$

and  $(C_n)^{-1}(\mathbf{y}(\mathbf{x}, S) - \mathbb{E}_n(\mathbf{y}(\mathbf{x}, S)))$  follows an independent standard normal random distribution, which shows that

$$\begin{aligned} \mathbb{E}_n[g(\mathbf{x}', \mathbf{1}) \mid \mathbf{y}(\mathbf{x}, S)] &= \mu_n(\mathbf{x}') \\ &+ \tilde{\sigma}_n(\mathbf{x}', \mathbf{x}, S) \mathbf{w}, \end{aligned} \quad (1.2)$$

where  $\mathbf{w}$  is an independent standard normal random vector.

## 2 Proofs Details

In this section we prove the theorems of the paper. We first show some smoothness properties of  $\tilde{\sigma}_n$ ,  $\mu_n$  and  $c_n$  in the following lemma.

**Lemma 1.** *We assume that the domain  $A$  is compact,  $\mu_0$  is a constant, the kernel  $K_0$  is continuously differentiable, and the prior parameters on  $\log c$  continuously differentiable. We then have that*

1. *Fix any  $\mathbf{x}$  and  $S$ . Then  $\mu_n(\mathbf{x}')$  and  $\tilde{\sigma}_n(\mathbf{x}', \mathbf{x}, S)$  are both continuously differentiable in  $\mathbf{x}'$ .*

2. Fix any  $\mathbf{x}'$  and number of fidelities  $|S|$ . Then  $\tilde{\sigma}_n(\mathbf{x}', \mathbf{x}, S)$  is continuously differentiable in  $\mathbf{x}$  and each element of  $S$ .
3.  $c_n$  is continuously differentiable.
4.  $\max_{1 \leq i \leq q} c_n(x_i, s_i)$  is differentiable in  $\mathbf{x}$  and  $\mathbf{s}$  if  $|\arg \max_{1 \leq i \leq q} c_n(x_i, s_i)| = 1$ .

*Proof.* The posterior parameters of the Gaussian process on  $\log c$  are continuously differentiable if its prior parameters are continuously differentiable (this proves (3)).

By (1.1), we know that that  $\tilde{\sigma}_n(\mathbf{x}', \mathbf{x}, S) = K_n((\mathbf{x}', \mathbf{1}), (\mathbf{x}, S)) (C_n^T)^{-1}$  where  $(\mathbf{x}, S) := \{(\mathbf{x}, \mathbf{s}) : \mathbf{s} \in S\}$  and  $C_n$  is the Cholesky factor of the covariance matrix  $K_n((\mathbf{x}, S), (\mathbf{x}, S)) + \sigma^2 I$ . Thus, (1) follows from continuous differentiability of  $K_n$ .

To prove (2) we only need to show that  $(C_n^T)^{-1}$  is continuously differentiable with respect to  $\mathbf{x}$  and the components of  $S$ . This follows from the fact that multiplication, matrix inversion (when the inverse exists), and Cholesky factorization [6] preserve continuous differentiability.

(4) follows easily from (3).  $\square$

We now prove Theorem 1.

*Proof of Theorem 1.* Recall the intuitive explanation of Theorem 1 given in the body of the paper:

$$\begin{aligned} & \nabla_{\mathbf{x}, S} \mathbb{E}_n \left[ \min_{\mathbf{x}'} (\mu_n(\mathbf{x}', \mathbf{1}) + \tilde{\sigma}_n(\mathbf{x}', \mathbf{x}, S) \cdot \mathbf{w}) \right] \\ &= \mathbb{E}_n \left[ \nabla_{\mathbf{x}, S} \min_{\mathbf{x}'} (\mu_n(\mathbf{x}', \mathbf{1}) + \tilde{\sigma}_n(\mathbf{x}', \mathbf{x}, S) \cdot \mathbf{w}) \right] \\ &= \mathbb{E}_n \left[ \nabla_{\mathbf{x}, S} (\mu_n(\mathbf{x}^*, \mathbf{1}) + \tilde{\sigma}_n(\mathbf{x}^*, \mathbf{x}, S) \cdot \mathbf{w}) \right] \\ &= \mathbb{E}_n \left[ \nabla_{\mathbf{x}, S} \tilde{\sigma}_n(\mathbf{x}^*, \mathbf{x}, S) \cdot \mathbf{w} \right], \end{aligned}$$

where  $\mathbf{x}^*$  is a global minimum (over  $\mathbf{x}' \in A$ ) of  $h(\mathbf{x}', \mathbf{x}, S) := \mu_n(\mathbf{x}', \mathbf{1}) + \tilde{\sigma}_n(\mathbf{x}', \mathbf{x}, S) \cdot \mathbf{w}$ ,  $\mathbf{w}$  is a standard normal random vector, and  $\nabla_{\mathbf{x}, S}$  indicates the gradient with respect to  $\mathbf{x}$  and  $S$  holding  $\mathbf{x}^*$  fixed.

To complete the proof, we need to justify the interchange of expectation and the gradient (the second line) and ignoring the dependence of  $\mathbf{x}^*$  on  $\mathbf{x}$  and  $S$  when taking the gradient (the third line).

We first justify the third line. By Lemma 1,  $h$  is continuously differentiable. Thus, by the envelope theorem (see Corollary 4 of Milgrom and Segal 4), even though  $\mathbf{x}^*$  depends on  $\mathbf{x}$  and  $S$ , this dependence can be ignored when computing  $\nabla_{\mathbf{x}, S} h(\mathbf{x}^*, \mathbf{x}, S)$  (observe that we assume that  $\mathbf{x}^*$  is unique in the statement of the theorem).

We now justify the fourth line. Recall that  $A$  is compact, components of  $\mathbf{s}$  have domain  $[0, 1]$ , and gradients with respect to  $S$  are taken assuming that  $|S|$  is

held fixed. Thus, the domain of  $\mathbf{x}, S$  is compact. Also  $\tilde{\sigma}_n(\mathbf{x}', \mathbf{x}, S)$  is continuously differentiable with respect to  $\mathbf{x}, S$  by Lemma 1. Thus  $\|\tilde{\sigma}_n(\mathbf{x}', \mathbf{x}, S)\|$  is bounded. Consequently, Corollary 5.9 of Bartle [1] implies that we can interchange the gradient and the expectation.  $\square$

The following corollary follows from the previous proof.

**Corollary 1.** *Under the assumptions of the previous theorem,  $L_n(\mathbf{x}, S)$  is continuous.*

We now prove Theorem 2.

*Proof.* We prove this theorem using Theorem 2.3 of Section 5 of Kushner and Yin [3], which depends on the structure of the stochastic gradient  $G$  of the objective function. In addition, we simplify the notation and denote  $(\mathbf{x}_t, S_t)$  by  $Z_t$ .

The theorem from Kushner and Yin [3], requires the following hypotheses:

1.  $\epsilon_t \rightarrow 0$ ,  $\sum_{t=1}^{\infty} \epsilon_t = \infty$ , and  $\sum_t \epsilon_t^2 < \infty$ .
2.  $\sup_t \mathbb{E} \left[ |G(Z_t)|^2 \right] < \infty$
3. There exist uniformly continuous functions  $\{\lambda_t\}_{t \geq 0}$  of  $Z$ , and random vectors  $\{\beta_t\}_{t \geq 0}$ , such that  $\beta_t \rightarrow 0$  almost surely and

$$E_n[G(Z_t)] = \lambda_t(Z_t) + \beta_t.$$

Furthermore, there exists a continuous function  $\bar{\lambda}$ , such that for each  $Z \in A^q$ ,

$$\lim_n \left| \sum_{i=1}^{m(r_m+s)} \epsilon_i [\lambda_i(Z) - \bar{\lambda}(Z)] \right| = 0$$

for each  $s \geq 0$ , where  $m(r)$  is the unique value of  $k$  such that  $t_k \leq t < t_{k+1}$ , where  $t_0 = 0, t_k = \sum_{i=0}^{k-1} \epsilon_i$ .

4. There exists a continuously differentiable real-valued function  $\phi$ , such that  $\bar{\lambda} = -\nabla \phi$  and it is constant on each connected subset of stationary points.
5. The constraint functions defining  $A$  are continuously differentiable.

We now prove that our problem satisfies these hypotheses. (1) is true by the hypothesis of the lemma.

We now prove (2). Letting  $\mathbf{x}^*$  be defined in terms of  $\mathbf{w}$  as in Theorem 2 and choosing a generic fixed  $Z$ ,

$$\begin{aligned} & \mathbb{E} \left[ \left| \nabla_{\mathbf{x}} \tilde{\sigma}_n(\mathbf{x}^*, Z) \cdot \mathbf{w} \right|^2 \right] \\ & \leq \mathbb{E} \left[ \left\| \nabla \tilde{\sigma}_n(\mathbf{x}^*, Z) \right\|^2 \|\mathbf{w}\|^2 \right] \leq M|S| \end{aligned}$$

where  $M := \sup_{\mathbf{x}, \mathbf{z}} \|\nabla \tilde{\sigma}_n(\mathbf{x}, \mathbf{z})\|^2$  and  $|S|$  is the dimensionality of  $\mathbf{w}$ .  $M$  is finite because the domain of the problem is compact and  $\nabla \tilde{\sigma}_n(\mathbf{x}, \mathbf{z})$  is continuous by Lemma 1. Since  $c_n$  is continuously differentiable and bounded below, we conclude that the supremum over  $Z$  of  $\mathbb{E} \left[ |G(Z)|^2 \right]$  is bounded.

We now prove (3). Our definition of  $\lambda_t$  will be the same for all  $t$ . Define

$$\begin{aligned} \lambda_t(Z) &= \mathbb{E} \left[ \frac{c_n(Z) \nabla \tilde{\sigma}_n(\mathbf{x}^*, Z) \mathbf{w}}{c_n(Z)^2} \right] \\ &\quad - \mathbb{E} \left[ \frac{\nabla c_n(Z)}{c_n(Z)^2} (\mu_n(\mathbf{x}^*, \mathbf{1}) + \tilde{\sigma}_n(\mathbf{x}^*, Z) \mathbf{w}) \right]. \end{aligned}$$

We will prove that  $\lambda_t$  is continuous. In the proof of Theorem 1, we show that  $\nabla \tilde{\sigma}_n(\mathbf{x}^*, Z) \mathbf{w}$  is continuous in  $Z$ . Furthermore,

$$\begin{aligned} \|\nabla \tilde{\sigma}_n(y_1, Z) \mathbf{w}\| &\leq \|\nabla \tilde{\sigma}_n(y_1, Z)\| \|\mathbf{w}\| \\ &\leq L \|\mathbf{w}\|. \end{aligned}$$

Consequently  $\mathbb{E} [\nabla \tilde{\sigma}_n(Y, Z) \mathbf{w}]$  is continuous by Corollary 5.7 of Bartle [1]. In Theorem 1, we also show that  $\mathbb{E} [(\mu_n(Y, \mathbf{1}) + \tilde{\sigma}_n(Y, Z) \mathbf{w})]$  is continuous in  $Z$ . Since  $c_n$  is continuously differentiable, we conclude that  $\lambda_t$  is continuous. By defining  $\beta_t = 0$  for all  $t$ , and  $\bar{\lambda} = \lambda_1$ , we conclude the proof of (3).

Finally, define  $\phi(Z) = -\mathbb{E} \left[ \frac{\mu_n(Y, \mathbf{1}) + \tilde{\sigma}_n(Y, Z) \mathbf{w}}{c_n(Z)} \right]$ . Observe that in Lemma 2, we show that we can interchange the expectation and the gradient in  $\mathbb{E} [\nabla (\mu_n(Y) + \tilde{\sigma}_n(Y, Z) \mathbf{w})]$ , and so  $\lambda_m(Z) = -\nabla \phi(Z)$ . In a connected subset of stationary points, we have that  $\lambda_m(Z) = 0$ , and so  $\phi(Z)$  is constant. This ends the proof of the theorem.  $\square$

*Proof of Proposition 1.* Since

$$\begin{aligned} & VOI_n(x, s) := \\ & \mathbb{E}_n[\mu^*(x, 1) - \min_{x'} (\mu_n(x') + C_n(x', (x, s))W)] \end{aligned}$$

where  $W$  is a standard normal random variable. By Jensen's inequality, we have

$$\begin{aligned} VOI_n(x, s) &:= \mathbb{E}_n[\mu^*(x, 1) - \min_{x'} (u_n(x', s, W))] \\ &\geq \mu^*(x, 1) - \min_{x'} \mathbb{E}_n(u_n(x', s, W)) = 0. \end{aligned}$$

where  $u_n(x, s, W) := \mu^n(x', 1) + C_n((x', 1), (x, s))W$ . The inequality becomes equal only if  $\min_{x'} (\mu_n(x') + C_n(x', (x, s))W)$  is a linear function of  $W$  for any fixed  $(x, s)$ , i.e. the argmin for the inner optimization function doesn't change as we vary  $W$ , which is not true if  $K_n((x', 1), (x, s)) > 0$  i.e. evaluating at  $(x, s)$  provides value to determine the argmin of the surface  $(x, 1)$ .  $\square$

*Proof of Proposition 2.* The proof follows a very similar argument than the previous proof. By Jensen's inequality, we have that

$$\begin{aligned} & \mathbb{E}_n \left[ \min_{x'} \mathbb{E}_n [g(x', 1) \mid \mathbf{y}(x, S)] \right] \geq \\ & \mathbb{E}_n \left[ \min_{x'} \mathbb{E}_n [g(x', 1) \mid \mathbf{y}(x, S \cup C(S))] \right] \end{aligned}$$

The inequality becomes equal only if the argmin for the inner optimization function doesn't change as we vary the normal random vector, which is not true under our assumptions.  $\square$

### 3 GPs for Hyperparameter Optimization

In the context of hyperparameter optimization with two continuous fidelities, i.e. the number of training iterations ( $s_{(1)}$ ) and the amount of training data ( $s_{(2)}$ ), we set the kernel function of the GP as

$$K_0(z, \tilde{z}) = K(x, \tilde{x}) \times K_1(s_{(1)}, \tilde{s}_{(1)}) \times K_2(s_{(2)}, \tilde{s}_{(2)}),$$

where  $K(\cdot, \cdot)$  is a square-exponential kernel. If we assume that the learning curve looks like

$$g(x, s) = h(x) \times (\beta_0 + \beta_1 \exp(-\lambda s_{(1)})) \times l(s_{(2)}), \quad (3.1)$$

then inspired by [8], we set the kernel  $K_1(\cdot, \cdot)$  as

$$K_1(s_{(1)}, \tilde{s}_{(1)}) = \left( w + \frac{\beta^\alpha}{(s_{(1)} + \tilde{s}_{(1)} + \beta^\alpha)} \right),$$

where  $w, \beta, \alpha > 0$  are hyperparameters. We add an intercept  $w$  compared to the kernel in [8] to model the fact that the loss will not diminish. We assume that the kernel  $K_2(\cdot, \cdot)$  has the form

$$K_2(s_{(2)}, \tilde{s}_{(2)}) = \left( c + (1 - s_{(2)})^{(1+\delta)} (1 - \tilde{s}_{(2)})^{(1+\delta)} \right),$$

where  $c, \delta > 0$  are hyperparameters.

All the hyperparameters can be treated in a Bayesian way as proposed in Snoek et al. [7].

## 4 Additional experimental details

### 4.1 Synthetic experiments

Here we define in detail the synthetic test functions on which we perform numerical experiments. The test functions are:

augmented-Branin( $\mathbf{x}, \mathbf{s}$ )

$$= \left( x_2 - \left( \frac{5.1}{4\pi^2} - 0.1 * (1 - s_1) \right) x_1^2 + \frac{5}{\pi} x_1 - 6 \right)^2 \\ + 10 * \left( 1 - \frac{1}{8\pi} \right) \cos(x_1) + 10$$

augmented-Hartmann( $\mathbf{x}, \mathbf{s}$ )

$$= (\alpha_1 - 0.1 * (1 - s_1)) \exp \left( - \sum_{j=1}^d A_{ij} (x_j - P_{1j})^2 \right) \\ + \sum_{i=2}^4 \alpha_i \exp \left( - \sum_{j=1}^d A_{ij} (x_j - P_{ij})^2 \right)$$

augmented-Rosenbrock( $\mathbf{x}, \mathbf{s}$ )

$$= \sum_{i=1}^2 (100 * (x_{i+1} - x_i^2 + 0.1 * (1 - s_1)))^2 \\ + (x_i - 1 + 0.1 * (1 - s_2))^2$$

### 4.2 Real-world experiments

The range of search domain for feedforward NN experiments: the learning rate in  $[10^{-6}, 10^0]$ , dropout rate in  $[0, 1]$ , batch size in  $[2^5, 2^{10}]$  and the number of units at each layer in  $[100, 1000]$ .

The range of search domain for CNN experiments: the learning rate in  $[10^{-6}, 1.0]$ , batch size  $[2^5, 2^{10}]$ , and number of filters in each convolutional block in  $[2^5, 2^9]$ .

## References

- [1] R. G. Bartle. *The elements of integration*. John Wiley & Sons, 1966.
- [2] A. Klein, S. Falkner, S. Bartels, P. Hennig, and F. Hutter. Fast Bayesian optimization of machine learning hyperparameters on large datasets. In *Artificial Intelligence and Statistics*, 2017.
- [3] H. Kushner and G. G. Yin. *Stochastic Approximation and Recursive Algorithms and Applications*, volume 35. Springer Science & Business Media, 2003.
- [4] P. Milgrom and I. Segal. Envelope theorems for arbitrary choice sets. *Econometrica*, 70(2):583–601, 2002.
- [5] C. E. Rasmussen and C. K. I. Williams. *Gaussian Processes for Machine Learning*. MIT Press, 2006. ISBN ISBN 0-262-18253-X.
- [6] S. P. Smith. Differentiation of the cholesky algorithm. *Journal of Computational and Graphical Statistics*, 4(2):134 – 147, 1995.
- [7] J. Snoek, H. Larochelle, and R. P. Adams. Practical Bayesian optimization of machine learning algorithms. In *Advances in Neural Information Processing Systems*, 2012.
- [8] K. Swersky, J. Snoek, and R. P. Adams. Freezethaw Bayesian optimization. *arXiv preprint arXiv:1406.3896*, 2014.
